# Supplementary material
Source: HighWire-hosted journal article supplement (https://www.cmajopen.ca/highwire/filestream/80900/field_highwire_adjunct_files/0/open-2015-0068-1-at.pdf)
Supplement: open-2015-0068-1-at.pdf [file open-2015-0068-1-at.pdf]

**Appendix 1 (as supplied by the authors): List of cancers**

| Cancer Site                                      | ICD-O-3 Site/Histology Type                                                                                                                                        |
|--------------------------------------------------|--------------------------------------------------------------------------------------------------------------------------------------------------------------------|
| Lung                                             | C34: bronchus and lung                                                                                                                                             |
| Oral                                             | C00: lip                                                                                                                                                           |
|                                                  | C01: base of tongue                                                                                                                                                |
|                                                  | C02: other and unspecified parts of tongue                                                                                                                         |
|                                                  | C03: gum                                                                                                                                                           |
|                                                  | C04: floor of mouth                                                                                                                                                |
|                                                  | C05: palate                                                                                                                                                        |
|                                                  | C06: other and unspecified parts of mouth                                                                                                                          |
|                                                  | C07: parotid gland                                                                                                                                                 |
|                                                  | C08: other and unspecified salivary glands                                                                                                                         |
|                                                  | C09: tonsil                                                                                                                                                        |
|                                                  | C10: oropharynx                                                                                                                                                    |
|                                                  | C11: nasopharynx                                                                                                                                                   |
|                                                  | C12: pyriform sinus                                                                                                                                                |
|                                                  | C13: hypopharynx                                                                                                                                                   |
|                                                  | C14: other and ill-defined sites in lip, oral cavity and pharynx                                                                                                   |
| Esophagus                                        | C15: esophagus                                                                                                                                                     |
| Stomach                                          | C16: stomach                                                                                                                                                       |
| Liver                                            | C22.0: liver (excludes intrahepatic bile duct - 22.1)                                                                                                              |
| Pancreas                                         | C25: pancreas                                                                                                                                                      |
| Colorectum                                       | C18: colon                                                                                                                                                         |
|                                                  | C19: rectosigmoid junction                                                                                                                                         |
|                                                  | C20: rectum                                                                                                                                                        |
|                                                  | C21: anus and anal canal                                                                                                                                           |
|                                                  | C26.0: intestinal tract, NOS                                                                                                                                       |
| Larynx                                           | C32: larynx                                                                                                                                                        |
| Cervix                                           | C53: cervix uteri                                                                                                                                                  |
| Ovarian (mucinous)                               | C56.9: ovary                                                                                                                                                       |
| Urinary Bladder                                  | C67: bladder                                                                                                                                                       |
| Kidney                                           | C64.9: kidney, NOS                                                                                                                                                 |
|                                                  | C65.9: renal pelvis                                                                                                                                                |
| Acute Myeloid Leukemia                           | 9840/3: Acute Myeloid leukemia, M6 type                                                                                                                            |
|                                                  | 9861/3: Acute myeloid leukemia, NOS                                                                                                                                |
| Melanoma                                         | C44 (Type 8720 - 8790): skin, nevi and melanomas                                                                                                                   |
| Mesothelioma                                     | Type 9050 - 9055: mesothelial neoplasms                                                                                                                            |
| Skin                                             | C44: Skin                                                                                                                                                          |
| Vagina                                           | C52: vagina                                                                                                                                                        |
| Penis                                            | C60: penis                                                                                                                                                         |
| Anal                                             | C21: anus and anal canal                                                                                                                                           |
| Vulva                                            | C51: vulva                                                                                                                                                         |
| Gastric mucosa associated lymphoid tissue (MALT) | M-9699/3: MALT                                                                                                                                                     |
| Non-Hodgkin's Lymphoma                           | Type 9590 - 9596: malignant lymphomas, NOS or diffuse                                                                                                              |
|                                                  | Type 9670 - 9690: mature B-cell lymphomas                                                                                                                          |
|                                                  | Type 9700 - 9719: mature T- and NK-cell lymphomas                                                                                                                  |
|                                                  | Type 9727 - 9729: precursor cell lymphoblastic lymphoma                                                                                                            |
|                                                  | Type 9823: B-cell chronic lymphocytic leukemia/small lymphocytic lymphoma (all sites except C42.0 - blood, C42.1 - bone marrow, C42.4 - hematopoietic system, NOS) |

Appendix to: Grundy A, Friedenreich CM, Poirier AE, et al. A methodologic framework to evaluate the number of cancers attributable to lifestyle and environment in Alberta. *CMAJ Open* 2016. DOI:10.9778/cmajo.20150068

Copyright © 2016 The Author(s) or their employer(s).  
To receive this resource in an accessible format, please contact us at [cmajgroup@cmaj.ca](mailto:cmajgroup@cmaj.ca).

|                          |                                                                                                                                                         |
|--------------------------|---------------------------------------------------------------------------------------------------------------------------------------------------------|
|                          | Type 9827: adult T-cell leukemia/lymphoma (HTLV-1) (all sites except C42.0 - blood, C42.1 - bone marrow, C42.4 - hematopoietic system, NOS)             |
| Hodgkin's Lymphoma       | Type 9650 - 9660: Hodgkin lymphoma                                                                                                                      |
| Burkitt's Lymphoma       | Type 9687/3: Burkitt lymphoma, NOS                                                                                                                      |
| Nasopharyngeal Carcinoma | C11: nasopharynx                                                                                                                                        |
| Breast                   | C50: breast                                                                                                                                             |
| Endometrium              | C54.1: endometrium                                                                                                                                      |
| Gall Bladder             | C23: gall bladder                                                                                                                                       |
| Prostate                 | C61: prostate gland                                                                                                                                     |
| Extrahepatic Bile Ducts  | C24.0: extrahepatic bile duct                                                                                                                           |
| Leukemia                 | Type 9733: Plasma cell leukemia (C42.1)                                                                                                                 |
|                          | Type 9742: mast cell leukemia (C42.1)                                                                                                                   |
|                          | Type 9800-9801: leukemia, NOS and acute leukemia, NOS                                                                                                   |
|                          | Type 9805: acute biphenotypic leukemia                                                                                                                  |
|                          | Type 9820: lymphoid leukemia                                                                                                                            |
|                          | Type 9826: Burkitt cell leukemia                                                                                                                        |
|                          | Type 9831: T-cell large granular lymphocytic leukemia                                                                                                   |
|                          | Type 9832: prolymphocytic leukemia, NOS                                                                                                                 |
|                          | Type 9833: prolymphocytic leukemia, B-cell type                                                                                                         |
|                          | Type 9834: prolymphocytic leukemia, T-cell type                                                                                                         |
|                          | Type 9835: precursor cell lymphoblastic leukemia, NOS                                                                                                   |
|                          | Type 9836: precursor B-cell lymphoblastic leukemia                                                                                                      |
|                          | Type 9837: precursor T-cell lymphoblastic leukemia                                                                                                      |
|                          | Type 9840: acute myeloid leukemia, M6 type                                                                                                              |
|                          | Type 9860: myeloid leukemia, NOS                                                                                                                        |
|                          | Type 9861: acute myeloid leukemia, NOS                                                                                                                  |
|                          | Type 9863: chronic myeloid leukemia, NOS                                                                                                                |
|                          | Type 9866: acute promyelocytic leukemia                                                                                                                 |
|                          | Type 9867: acute myelomonocytic leukemia                                                                                                                |
|                          | Type 9870: acute basophilic leukemia                                                                                                                    |
|                          | Type 9871: acute myeloid leukemia with abnormal marrow eosinophils                                                                                      |
|                          | Type 9872: acute myeloid leukemia, minimal differentiation                                                                                              |
|                          | Type 9873: acute myeloid leukemia with maturation                                                                                                       |
|                          | Type 9874: acute myeloid leukemia, with maturation                                                                                                      |
|                          | Type 9875: chronic myelogenous leukemia, BCR/ABL positive                                                                                               |
|                          | Type 9876: chronic myelogenous leukemia, BCR/ABL negative                                                                                               |
|                          | Type 9891: acute monocytic leukemia                                                                                                                     |
|                          | Type 9895: acute myeloid leukemia with multilineage dysplasia                                                                                           |
|                          | Type 9896: acute myeloid leukemia, t(8;21)(q22;q22)                                                                                                     |
|                          | Type 9897: acute myeloid leukemia, 11q23 abnormalities                                                                                                  |
|                          | Type 9910: acute megakaryoblastic leukemia                                                                                                              |
|                          | Type 9920: therapy-related acute myeloid leukemia, NOS                                                                                                  |
|                          | Type 9930: Myeloid sarcoma                                                                                                                              |
|                          | Type 9931: acute panmyelosis with myelofibrosis (C42.1)                                                                                                 |
|                          | Type 9940-9948: other leukemias                                                                                                                         |
|                          | Type 9963: chronic neutrophilic leukemia                                                                                                                |
|                          | Type 9964: hypereosinophilic syndrome                                                                                                                   |
|                          | Type 9823: B-cell chronic lymphocytic leukemia/small lymphocytic lymphoma (sites C42.0 - blood, C42.1 - bone marrow, C42.4 - hematopoietic system, NOS) |
|                          | Type 9827: adult T-cell leukemia/lymphoma (HTLV-1) (sites C42.0 - blood, C42.1 - bone                                                                   |

|                |                                                                                                                                  |
|----------------|----------------------------------------------------------------------------------------------------------------------------------|
|                | marrow, C42.4 - hematopoietic system, NOS)                                                                                       |
| Salivary Gland | C07: parotid gland                                                                                                               |
|                | C08: other and unspecified salivary glands                                                                                       |
| Brain and CNS  | C70: meninges                                                                                                                    |
|                | C71: brain                                                                                                                       |
|                | C72: spinal cord, cranial nerves, and other parts of central nervous system                                                      |
| Thyroid        | C73.9: thyroid gland                                                                                                             |
| Bone           | C40: bones, joints and articular cartilage of limbs<br>C41: bones, joints and articular cartilage of other and unspecified sites |
